# Supplementary material for: Food Service Kitchen Scraps as a Source of Bioactive Phytochemicals: Disposal Survey, Optimized Extraction, Metabolomic Screening and Chemometric Evaluation
Source: MDPI journal article supplement (doi:10.3390/metabo13030386), 2023-03-05
Supplement: s1 [file s1]

**Table S3. All phenolic compounds tentatively identified by LC-MS<sup>E</sup> separated by classes and in retention time order.**

| Number     | Common Name                                              | Molecular Formula | m/z (exp.) | RT (min) | Score (%) | Frag Score (%) | Frag database                                                                                                                                                                                                                                                                                                         | Mass Error (ppm) | Isotope Similarity | Normalised abundance |       |              |        |             |             |       |              |        |             |             |       |              |        |             |   |
|------------|----------------------------------------------------------|-------------------|------------|----------|-----------|----------------|-----------------------------------------------------------------------------------------------------------------------------------------------------------------------------------------------------------------------------------------------------------------------------------------------------------------------|------------------|--------------------|----------------------|-------|--------------|--------|-------------|-------------|-------|--------------|--------|-------------|-------------|-------|--------------|--------|-------------|---|
|            |                                                          |                   |            |          |           |                |                                                                                                                                                                                                                                                                                                                       |                  |                    | TPC                  |       |              |        |             | SM          |       |              |        |             | US          |       |              |        |             |   |
|            |                                                          |                   |            |          |           |                |                                                                                                                                                                                                                                                                                                                       |                  |                    | Carrot peel          | Chard | Chayote peel | Papaya | Papaya seed | Carrot peel | Chard | Chayote peel | Papaya | Papaya seed | Carrot peel | Chard | Chayote peel | Papaya | Papaya seed |   |
| FLAVONOIDS |                                                          |                   |            |          |           |                |                                                                                                                                                                                                                                                                                                                       |                  |                    |                      |       |              |        |             |             |       |              |        |             |             |       |              |        |             |   |
| 1          | Neohesperidin                                            | C28H34O15         | 609.1879   | 0.57     | 43.3      | 37.1           | 59.0120 (6.16%); 71.0120 (39.12%); 89.0226 (21.71%); 119.0330 (9.30%); 127.0380 (5.86%); 143.0331 (8.73%); 161.0437 (19.61%); 439.0833 (4.84%); 503.1611 (10.41%); 533.1717 (6.11%)                                                                                                                                   | 8.88             | 89.46              |                      |       |              |        |             |             | X     |              | X      | X           | X           |       |              |        | X           |   |
| 2          | Theaflavin                                               | C29H24O12         | 563.1220   | 0.62     | 37.6      | 0.2            | 83.0120 (10.88%); 85.0319 (5.45%)                                                                                                                                                                                                                                                                                     | 4.47             | 92.76              |                      |       |              |        |             |             |       |              |        | X           |             |       |              |        |             |   |
| 3          | Rhamnetin                                                | C16H12O7          | 315.0517   | 0.69     | 37.1      | 5.0            | 123.0431 (4.14%); 159.0090 (5.56%)                                                                                                                                                                                                                                                                                    | 2.03             | 82.68              |                      |       |              |        |             |             |       |              | X      |             |             |       |              | X      |             |   |
| 4          | Cyanidin 3-O-galactoside                                 | C21H21O11+        | 448.1049   | 0.77     | 36.5      | 0.1            | 92.0240 (0.94%)                                                                                                                                                                                                                                                                                                       | 8.54             | 91.78              |                      |       |              |        |             |             | X     |              | X      |             |             |       | X            | X      |             |   |
| 5          | Peonidin 3-O-arabinoside                                 | C21H21O11+        | 448.1027   | 1.41     | 41.0      | 21.4           | 330.0770 (2.89%); 341.0922 (9.16%)                                                                                                                                                                                                                                                                                    | 3.62             | 88.10              |                      |       |              |        |             |             | X     |              |        |             |             |       | X            |        |             |   |
| 6          | Cyanidin 3-O-(6'-caffeoyl-glucoside)                     | C30H27O14+        | 610.1267   | 2.72     | 43.1      | 41.7           | 73.0277 (15.38%); 83.0120 (9.13%); 99.0070 (15.24%); 117.0327 (2.21%); 313.0915 (20.36%)                                                                                                                                                                                                                              | -9.94            | 84.84              |                      |       |              |        |             |             |       |              |        | X           |             |       |              |        |             | X |
| 7          | Cirsimaritin                                             | C17H14O6          | 313.07014  | 2.94     | 37.8      | 0              | 0                                                                                                                                                                                                                                                                                                                     | -5.16            | 95.03              |                      |       |              | X      |             |             |       |              |        |             |             |       |              |        |             |   |
| 8          | (-)-Epigallocatechin                                     | C15H14O7          | 305.0690   | 3.80     | 38.9      | 7.3            | 123.0432 (3.31%); 167.0331 (10.94%); 197.0437 (2.28%)                                                                                                                                                                                                                                                                 | 7.47             | 95.41              | X                    | X     |              | X      | X           | X           | X     |              | X      | X           | X           | X     |              |        | X           | X |
| 9          | Kaempferol 3-O-rhamnoside                                | C21H19O10-        | 430.0918   | 3.88     | 35.5      | 0.0            | 0                                                                                                                                                                                                                                                                                                                     | 2.97             | 80.77              |                      |       |              |        |             |             | X     |              |        |             |             |       | X            |        |             |   |
| 10         | Tectoridin                                               | C22H22O11         | 461.1084   | 3.90     | 37.7      | 0.0            | 0                                                                                                                                                                                                                                                                                                                     | -1.24            | 88.06              |                      |       |              |        |             |             |       |              |        |             |             |       |              | X      |             |   |
| 11         | (-)-Epicatechin                                          | C15H14O6          | 289.06921  | 3.91     | 36.6      | 0              | 0                                                                                                                                                                                                                                                                                                                     | -8.81            | 92.51              | X                    | X     |              | X      | X           |             |       |              |        |             |             |       |              |        |             | X |
| 12         | Kaempferide                                              | C16H11O6-         | 298.0499   | 3.94     | 36.0      | 0.0            | 0                                                                                                                                                                                                                                                                                                                     | 5.34             | 85.99              |                      |       |              |        |             |             | X     |              | X      | X           |             |       |              | X      |             |   |
| 13         | Chrysoeriol 7-O-apiosyl-glucoside                        | C27H30O15         | 593.1509   | 4.10     | 47.8      | 43.4           | 73.0278 (36.10%); 83.0120 (30.46%); 193.0490 (82.02%); 259.0594 (2.03%); 283.0598 (3.65%); 353.0652 (83.92%); 383.0753 (38.07%)                                                                                                                                                                                       | -0.52            | 96.46              |                      |       | X            |        |             |             |       |              | X      |             |             |       |              | X      |             |   |
| 14         | Peonidin 3-O-glucoside                                   | C22H23O11+        | 462.1182   | 4.13     | 36.3      | 0.6            | 79.0171 (6.48%); 107.0120 (22.48%)                                                                                                                                                                                                                                                                                    | 3.01             | 84.48              |                      |       |              |        |             |             |       |              |        | X           |             |       |              |        |             |   |
| 15         | Luteolin 6-C-glucoside                                   | C21H20O11         | 447.0898   | 4.17     | 42.8      | 29.2           | 92.0250 (2.835); 117.0327 (18.70%); 130.0288 (3.03%); 145.0276 (4.72%); 232.0548 (3.25%); 273.0394 (1.17%); 401.0846 (4.24%)                                                                                                                                                                                          | -7.70            | 93.45              |                      |       |              | X      | X           |             |       | X            | X      |             |             |       | X            | X      | X           |   |
| 16         | Eriocitrin/Neoeriocitrin                                 | C27H32O15         | 595.1664   | 4.36     | 36.9      | 0.0            | 0                                                                                                                                                                                                                                                                                                                     | -0.66            | 84.51              |                      |       |              |        |             |             |       |              | X      |             |             |       |              | X      |             |   |
| 17         | Quercetin 3-O-rhamnosyl-rhamnosyl-glucoside              | C33H40O20         | 755.2042   | 4.55     | 48.5      | 54.0           | 151.0017 (4.39%); 156.0404 (3.17%); 255.0282 (5.92%); 271.0232 (9.71%); 272.0286 (2.32%); 300.0259 (100%); 301.0310 (30.02%)                                                                                                                                                                                          | 0.25             | 88.75              |                      |       |              |        | X           |             |       |              | X      |             |             |       |              |        |             | X |
| 18         | Apigenin 7-O-apiosyl-glucoside                           | C26H28O14         | 563.1400   | 4.60     | 51.0      | 62.0           | 117.0326 (7.03%); 267.0258 (1.76%); 282.0518 (4.75%); 283.0593 (8.76%); 297.0357 (11.04%); 309.0372 (1.30%); 311.0547 (10.09%); 323.0547 (9.63%); 324.0613 (6.21%); 325.0701 (26.84%); 353.0651 (100%); 365.0654 (18.05%); 383.0759 (70.08%); 395.0762 (5.87%); 413.0869 (6.69%); 443.0973 (12.70%); 473.1082 (8.11%) | -1.07            | 94.09              |                      |       |              | X      |             |             |       |              | X      |             |             |       |              | X      |             |   |
| 19         | Genistin                                                 | C21H20O10         | 431.1012   | 4.62     | 35.2      | 0.0            | 0                                                                                                                                                                                                                                                                                                                     | 6.45             | 83.55              |                      |       |              |        |             |             |       |              |        | X           |             |       |              |        |             | X |
| 20         | Quercetin 3-O-glucuronide                                | C21H18O13         | 477.0632   | 4.66     | 41.2      | 25.7           | 446.0454 (3.02%)                                                                                                                                                                                                                                                                                                      | -8.84            | 90.24              |                      |       | X            |        |             |             | X     |              | X      | X           |             |       | X            |        | X           |   |
| 21         | Luteolin 7-O-rutinoside                                  | C27H30O15         | 593.1509   | 4.72     | 37.1      | 0.0            | 0                                                                                                                                                                                                                                                                                                                     | -0.47            | 85.99              |                      |       |              |        | X           | X           |       |              | X      |             |             |       |              |        |             |   |
| 22         | Dihydroformononetin                                      | C16H14O4          | 269.08121  | 4.76     | 55.1      | 95.5           | 121.0274 (100%)                                                                                                                                                                                                                                                                                                       | -2.68            | 83.25              |                      |       |              |        | X           |             |       |              |        |             |             |       | X            |        |             |   |
| 23         | Apigenin 6,8-di-C-glucoside                              | C27H30O15         | 593.1515   | 4.82     | 37.6      | 0.0            | 0                                                                                                                                                                                                                                                                                                                     | 0.45             | 88.36              |                      |       |              |        |             |             |       |              | X      |             |             |       |              | X      |             |   |
| 24         | 4'-O-Methylepigallocatechin                              | C16H16O7          | 319.08228  | 4.91     | 38.1      | 0              | 0                                                                                                                                                                                                                                                                                                                     | -0.14            | 90.86              | X                    |       |              |        | X           |             |       |              |        |             |             |       |              |        |             |   |
| 25         | Apigenin 6-C-glucoside                                   | C21H20O10         | 431.09714  | 4.99     | 56.5      | 93             | 283.0595 (78.06%); 300.0273 (100%); 301.0334 (47.81%); 311.0543 (38.98%); 359.0659 (28.68%)                                                                                                                                                                                                                           | -2.84            | 92.91              |                      |       |              | X      | X           |             |       |              |        |             |             |       |              |        |             |   |
| 26         | Apigenin 7-O-neohesperidoside                            | C27H30O14         | 577.1556   | 5.01     | 48.7      | 56.4           | 116.0490 (84.87%); 353.0653 (18.57%)                                                                                                                                                                                                                                                                                  | -1.23            | 88.48              |                      |       |              | X      | X           |             |       |              | X      |             |             |       |              | X      |             |   |
| 27         | 5,7-Dihydroxyflavanone/Isoliquiritigenin/Dihydrodadszein | C15H12O4          | 255.0653   | 5.11     | 36.0      | 0.0            | 0                                                                                                                                                                                                                                                                                                                     | -3.76            | 84.17              |                      |       |              |        |             |             |       |              |        |             |             |       |              |        |             | X |
| 28         | Not id compound I                                        | C16H12O6          | 299.05583  | 5.18     | 38.6      | 0              | 0                                                                                                                                                                                                                                                                                                                     | -0.95            | 94.22              |                      |       | X            |        |             | X           |       |              |        |             |             |       |              |        |             |   |
| 29         | Quercetin 3-O-rutinoside                                 | C27H30O16         | 609.1461   | 5.24     | 48.2      | 44.3           | 255.0284 (7.89%); 263.0582 (100%); 271.0232 (21.35%); 301.0326 (42.46%)                                                                                                                                                                                                                                               | 0.00             | 96.89              |                      |       |              |        | X           |             |       |              |        |             |             |       | X            |        |             |   |
| 30         | Petrellin                                                | C19H18O8          | 373.0950   | 5.38     | 37.4      | 0.0            | 0                                                                                                                                                                                                                                                                                                                     | 5.76             | 93.81              |                      |       |              |        |             |             |       |              |        | X           |             |       |              |        |             |   |
| 31         | Gardenin B                                               | C19H18O7          | 357.0969   | 5.43     | 36.1      | 0.0            | 0                                                                                                                                                                                                                                                                                                                     | -3.12            | 83.93              |                      |       |              |        |             |             |       |              |        | X           |             |       |              |        |             |   |
| 32         | Apigenin 7-O-rutinoside                                  | C27H30O14         | 577.1561   | 5.46     | 44.0      | 32.7           | 59.0118 (27.31%); 158.0593 (100%); 353.0651 (89.60%)                                                                                                                                                                                                                                                                  | -0.32            | 87.79              |                      |       |              |        |             |             |       |              | X      |             |             |       |              | X      |             |   |
| 33         | Eriodictyol                                              | C15H12O6          | 287.0548   | 5.47     | 42.0      | 18.4           | 59.0118 (32.92%); 241.0493 (46.14%)                                                                                                                                                                                                                                                                                   | -4.41            | 96.51              |                      |       | X            |        |             | X           |       |              |        |             |             |       |              |        |             | X |
| 34         | Phlorein                                                 | C15H14O5          | 273.0755   | 5.49     | 41.0      | 26.4           | 241.0493 (43.98%)                                                                                                                                                                                                                                                                                                     | -4.84            | 83.95              |                      |       | X            |        |             | X           |       |              |        |             |             |       |              |        |             | X |
| 35         | Glycitin                                                 | C22H22O10         | 445.1133   | 5.53     | 39.0      | 8.1            | 117.0331 (17.47%); 309.0611 (1.90%)                                                                                                                                                                                                                                                                                   | -1.52            | 88.68              |                      |       |              |        |             |             | X     |              |        |             |             |       | X            |        | X           |   |
| 36         | Eupatorin/Cirsilineol                                    | C18H16O7          | 343.0847   | 5.63     | 36.9      | 0.0            | 0                                                                                                                                                                                                                                                                                                                     | 6.79             | 91.98              |                      |       |              |        |             |             |       |              |        |             |             |       |              |        |             | X |
| 37         | Not id compounds II                                      | C16H12O6          | 299.05569  | 5.63     | 57.6      | 97.7           | 269.0443 (100%)                                                                                                                                                                                                                                                                                                       | -1.39            | 91.95              |                      |       | X            |        |             |             |       |              |        |             |             |       |              |        |             |   |

[illegible]

|                   |                                 |           |           |      |       |      |                                                                                                                           |        |       |   |   |   |   |   |   |   |   |   |   |   |   |   |   |   |
|-------------------|---------------------------------|-----------|-----------|------|-------|------|---------------------------------------------------------------------------------------------------------------------------|--------|-------|---|---|---|---|---|---|---|---|---|---|---|---|---|---|---|
| 94                | Benzoic acid                    | C7H6O2    | 121.0285  | 3.35 | 38.0  | 0.0  | 0                                                                                                                         | -8.12  | 99.23 | X | X | X | X | X |   |   |   |   |   |   |   |   |   |   |
| 95                | 5-Caffeoylquinic acid           | C16H18O9  | 353.0864  | 3.41 | 45.1  | 33.3 | 85.0276 (4.53%); 87.0069 (1.29%); 127.0381 (1.82%); 135.0431 (1.83%); 161.0224 (2.50%); 173.0437 (1.26%); 191.0543 (100%) | -3.91  | 96.87 | X | X |   |   |   | X | X |   | X | X |   |   |   |   |   |
| 96                | 4-Hydroxymandelic acid          | C8H8O4    | 167.03415 | 3.42 | 55.5  | 92.1 | 125.0244 (100%)                                                                                                           | -4.98  | 91.19 |   | X |   |   | X |   |   |   |   |   |   |   |   |   |   |
| 97                | 3-Hydroxyphenylacetic acid      | C8H8O3    | 151.03887 | 3.44 | 52.1  | 77.0 | 125.0244 (100%)                                                                                                           | -7.89  | 92.06 |   | X | X | X | X |   |   |   |   |   |   |   |   |   |   |
| 98                | Vanillic acid                   | C10H12O5  | 211.0594  | 3.51 | 41.8  | 25.9 | 168.0768 (35.97%)                                                                                                         | -8.47  | 92.41 |   |   |   | X |   |   |   | X |   |   |   |   |   |   |   |
| 99                | 3-Feruloylquinic acid           | C17H20O9  | 367.1025  | 3.59 | 45.4  | 31.2 | 117.0332 (18.38%); 155.0329 (12.09%); 193.0493 (100%)                                                                     | -2.69  | 98.92 | X | X |   |   |   | X | X |   |   |   | X | X |   |   |   |
| 100               | Phenylacetic acid               | C8H8O2    | 135.0448  | 3.60 | 39.3  | 0.0  | 0                                                                                                                         | -2.55  | 99.76 | X | X | X | X | X |   |   |   |   |   |   |   |   |   |   |
| 101               | Dihydroxybenzoic acid isomer IV | C7H6O4    | 153.0189  | 3.64 | 39.1  | 0.0  | 0                                                                                                                         | -3.04  | 98.92 |   | X | X | X | X |   |   |   |   |   |   |   |   |   |   |
| 102               | Feruloyl glucose                | C16H20O9  | 355.1026  | 3.64 | 35.9  | 0.0  | 0                                                                                                                         | -2.40  | 82.21 | X | X |   |   |   |   |   |   |   |   |   |   |   |   |   |
| 103               | 2,3,4-Trihydroxybenzoic acid    | C7H6O5    | 169.01409 | 3.65 | 47.5  | 44.9 | 113.0239 (60.82%)                                                                                                         | -0.91  | 93.55 |   | X |   |   | X |   |   |   |   |   |   |   |   |   |   |
| 104               | Phenacetyl glycine              | C10H11NO3 | 192.0648  | 3.72 | 37.6  | 0.0  | 0                                                                                                                         | -9.48  | 98.31 |   |   |   |   |   |   |   | X | X |   |   |   |   |   | X |
| 105               | Caffeoylquinic acid isomer III  | C16H18O9  | 353.08644 | 3.75 | 56.6  | 98.1 | 191.0562 (100%)                                                                                                           | -3.86  | 89.62 | X |   |   |   |   |   |   |   |   |   |   |   |   |   |   |
| 106               | Dihydroferulic acid             | C10H12O4  | 195.0646  | 3.86 | 36.4  | 4.8  | 73.0277 (100%); 83.0120 (76.95%)                                                                                          | -8.40  | 86.50 |   |   |   |   |   |   |   | X |   |   |   |   |   |   |   |
| 107               | 4-p-Coumaroylquinic acid        | C16H18O8  | 337.09195 | 3.92 | 57.9  | 98.0 | 119.0508 (24.03%); 191.0561 (100%)                                                                                        | -2.77  | 94.52 | X | X |   |   |   |   |   |   |   |   |   |   |   |   |   |
| 108               | Homovanillic acid               | C9H10O4   | 181.05063 | 3.96 | 38.2  | 0.0  | 0                                                                                                                         | 0.00   | 90.88 | X |   |   |   |   |   |   |   |   |   |   |   |   |   |   |
| 109               | O-Methylgallic acid isomer II   | C8H8O5    | 183.0281  | 4.20 | 37.5  | 0.0  | 0                                                                                                                         | -10.00 | 98.50 |   | X |   |   |   |   |   | X |   |   |   |   |   |   | X |
| 110               | m-Coumaric acid                 | C9H8O3    | 163.03939 | 4.31 | 37.3  | 0.0  | 0                                                                                                                         | -4.11  | 91.24 | X |   | X | X | X |   |   |   |   |   |   |   |   |   |   |
| 111               | Rosmarinic acid                 | C18H16O8  | 359.0792  | 4.32 | 38.5  | 14.2 | 135.0431 (100%); 239.0548 (34.16%)                                                                                        | 5.49   | 84.62 | X |   |   |   |   |   |   | X |   |   |   |   |   |   |   |
| 112               | p-Coumaric acid                 | C9H8O3    | 163.03972 | 4.58 | 58.1  | 96.2 | 119.0510 (100%)                                                                                                           | -2.15  | 96.94 | X | X | X | X | X |   |   |   |   |   |   |   |   |   |   |
| 113               | Cinnamic acid                   | C9H8O2    | 147.0452  | 4.62 | 39.7  | 0.0  | 0                                                                                                                         | 0.35   | 98.71 | X |   | X | X | X | X |   |   |   |   |   |   |   |   |   |
| 114               | Ethyl caffeate                  | C11H12O4  | 207.06478 | 4.69 | 35.9  | 0.0  | 0                                                                                                                         | -7.21  | 87.87 |   | X | X |   |   |   |   |   |   |   |   |   |   |   |   |
| 115               | Isoferulic acid                 | C10H10O4  | 193.05006 | 5.03 | 57.0  | 90.2 | 130.0422 (100%); 133.0286 (25.06%)                                                                                        | -2.95  | 98.48 | X | X | X | X | X |   |   |   |   |   |   |   |   |   |   |
| 116               | Kaempferol 3-O-rutinoside       | C27H30O15 | 593.1509  | 5.26 | 37.0  | 4.7  | 283.0234 (4.97%)                                                                                                          | -0.43  | 80.70 |   |   |   |   |   |   |   | X |   |   |   |   |   |   |   |
| 117               | Trans-ferulic acid              | C10H10O4  | 193.0489  | 5.36 | 37.6  | 0.0  | 0                                                                                                                         | -8.75  | 97.52 |   |   |   |   |   |   |   | X | X | X |   |   | X | X | X |
| 118               | Dicafeoylquinic acid isomer I   | C25H24O12 | 515.1199  | 5.51 | 42.8  | 24.1 | 161.0224 (22.64%)                                                                                                         | 0.78   | 90.98 | X |   |   |   |   |   |   |   |   |   |   |   |   |   |   |
| 119               | Ferulic acid                    | C10H10O4  | 193.0490  | 5.53 | 42.0  | 21.7 | 117.0331 (100%)                                                                                                           | -8.59  | 97.67 | X | X | X | X | X |   |   | X | X | X | X | X | X | X | X |
| 120               | Sinapic acid                    | C11H12O5  | 223.0598  | 5.56 | 46.1  | 40.2 | 121.0282 (66.82%); 149.0230 (100%); 166.0253 (5.33%); 167.0330 (54.78%)                                                   | -6.35  | 97.63 |   | X |   | X |   |   |   | X |   | X |   |   | X |   | X |
| 121               | Dicafeoylquinic acid isomer II  | C25H24O12 | 515.1200  | 5.66 | 41.1  | 8.2  | 161.0234 (3.54%)                                                                                                          | 0.90   | 98.21 | X |   |   |   |   |   |   |   |   |   |   |   |   |   |   |
| 122               | Hippuric acid                   | C9H9NO3   | 178.0497  | 5.68 | 35.4  | 0.0  | 0                                                                                                                         | -7.12  | 85.15 |   |   |   |   |   |   |   | X |   |   |   |   |   |   |   |
| 123               | Dihydro-p-coumaric acid         | C9H10O3   | 165.05481 | 5.90 | 38.3  | 0.0  | 0                                                                                                                         | -5.45  | 97.53 | X |   |   |   |   |   |   |   |   |   |   |   |   |   |   |
| 124               | 4-Hydroxybenzoic acid           | C7H6O3    | 137.0238  | 5.92 | 50.5  | 58.1 | 92.0257 (80.05%); 119.0122 (100%)                                                                                         | -4.30  | 99.49 | X | X | X | X | X | X |   |   | X |   |   |   |   |   | X |
| 125               | Dicafeoylquinic acid isomer III | C25H24O12 | 515.1199  | 6.03 | 50.7  | 56.8 | 135.0446 (59.78%); 179.0346 (73.43%); 353.0872 (5.26%)                                                                    | 0.74   | 97.37 | X |   |   |   |   |   |   |   |   |   |   |   |   |   |   |
| 126               | Dicafeoylquinic acid isomer IV  | C25H24O12 | 515.1186  | 6.29 | 44.1  | 25.0 | 135.0431 (41.76%); 179.0330 (67.93%); 353.0865 (9.38%)                                                                    | -1.77  | 97.62 |   |   |   |   |   | X |   |   |   |   |   | X |   |   |   |
| 127               | Danshensu                       | C9H10O5   | 197.0457  | 7.16 | 40.6  | 14.4 | 141.0542 (7.46%); 144.0440 (15.20%); 154.0642 (10.18%); 156.0439 (19.05%); 172.0392 (7.65%)                               | 0.76   | 89.58 |   |   |   |   |   |   |   | X |   |   |   |   |   |   |   |
| 128               | Caffeic acid                    | C9H8O4    | 179.0346  | 7.67 | 56.8  | 87.7 | 135.0445 (100%)                                                                                                           | -1.94  | 98.56 | X | X | X | X | X | X |   |   |   |   |   |   |   |   |   |
| 129               | Cinnamoyl glucose               | C15H18O7  | 309.1004  | 8.87 | 37.1  | 10.9 | 85.0281 (39.49%); 265.0528 (5.77%); 267.0901 (17.29%); 295.0854 (9.94%)                                                   | 7.78   | 83.51 |   |   |   |   |   |   |   | X |   |   |   |   |   |   |   |
| OTHER POLYPHENOLS |                                 |           |           |      |       |      |                                                                                                                           |        |       |   |   |   |   |   |   |   |   |   |   |   |   |   |   |   |
| 130               | Hydroxytyrosol                  | C8H10O3   | 153.05473 | 1.08 | 36.7  | 0    | 0                                                                                                                         | -6.42  | 91.04 |   |   |   |   | X | X |   |   |   |   |   |   |   |   |   |
| 131               | 4-Vinylphenol                   | C8H8O     | 119.04967 | 1.10 | 37.2  | 0    | 0                                                                                                                         | -4.73  | 91.47 |   | X |   |   | X | X |   |   |   |   |   |   |   |   |   |
| 132               | Oleuropein                      | C25H32O13 | 539.1718  | 1.12 | 38.3  | 8.8  | 118.0284 (0.82%); 134.0593 (32.88%); 175.0400 (1.56%); 206.0447 (2.69%); 212.0668 (2.23%); 242.0769 (3.12%)               | -9.58  | 93.05 |   |   |   |   |   |   |   |   | X |   |   |   |   |   |   |
| 133               | Curcumin                        | C21H20O6  | 367.1162  | 1.24 | 36.7  | 3.1  | 83.0120 (4.58%); 97.0277 (17.17%)                                                                                         | -6.82  | 87.90 |   |   |   |   |   |   |   |   | X |   |   |   |   |   |   |
| 134               | 3,4-Dihydroxyphenylglycol       | C8H10O4   | 169.0495  | 1.67 | 37.9  | 0.0  | 0                                                                                                                         | -6.52  | 96.67 |   |   |   |   |   |   |   |   |   |   |   |   | X |   | X |
| 135               | Catechol                        | C6H6O2    | 109.02891 | 1.78 | 38.1  | 0    | 0                                                                                                                         | -5.42  | 96.82 |   | X |   |   | X |   |   |   |   |   |   |   |   |   |   |
| 136               | Salvianolic acid D              | C11H10O6  | 237.0391  | 2.23 | 44.4  | 35.9 | 181.0123 (100%)                                                                                                           | -5.57  | 92.34 |   |   |   |   |   |   |   |   | X |   |   |   |   |   | X |
| 137               | Pyrogallol                      | C6H6O3    | 125.0235  | 2.50 | 38.4  | 2.8  | 79.0185 (3.68%)                                                                                                           | -7.42  | 97.71 |   | X | X | X | X | X |   |   | X |   |   |   |   |   | X |
| 138               | Methylcatechol isomer I         | C7H8O2    | 123.04527 | 2.51 | 39.6  | 0    | 0                                                                                                                         | 0.92   | 99.21 |   | X |   |   | X |   |   |   |   |   |   |   |   |   |   |
| 139               | Syringaldehyde                  | C9H10O4   | 181.0489  | 2.92 | 38.5  | 12.0 | 116.0488 (100%)                                                                                                           | -9.61  | 91.14 | X |   | X |   |   |   |   | X | X |   | X | X | X | X | X |
| 140               | Protocatechuic aldehyde         | C7H6O3    | 137.0237  | 2.93 | 55.2  | 83.6 | 108.0217 (93.03%); 123.0455 (100%)                                                                                        | -5.47  | 98.84 | X | X | X | X | X | X |   |   |   |   |   |   |   |   |   |
| 141               | Resacetophenone                 | C8H8O3    | 151.03886 | 2.94 | 55.5  | 91.5 | 108.0217 (93.03%); 123.0455 (100%)                                                                                        | -7.95  | 94.78 |   |   |   | X |   |   |   |   |   |   |   |   |   |   |   |
| 142               | Acetyl eugenol                  | C12H14O3  | 205.0866  | 2.94 | 37.3  | 0.0  | 0                                                                                                                         | -2.04  | 88.88 |   |   |   |   |   |   |   | X |   |   |   |   |   |   |   |
| 143               | Isopimpinellin                  | C13H10O5  | 245.04432 | 3.05 | 36    | 0    | 0                                                                                                                         | -4.98  | 85.81 |   |   |   | X |   |   |   |   |   |   |   |   |   |   |   |
| 144               | Myricenic Acid                  | C9H6O3    | 161.02443 | 3.19 | 50.9  | 57.5 | 133.0297 (40.60%); 134.0368 (15.40%); 135.0450 (67.22%)                                                                   | 0.10   | 97.03 | X |   |   |   |   |   |   |   |   |   |   |   |   |   |   |
| 145               | Methylcatechol isomer II        | C7H8O2    | 123.04432 | 3.26 | 51.8  | 69   | 108.0214 (100%)                                                                                                           | -6.69  | 97.84 |   | X |   |   | X |   |   |   |   |   |   |   |   |   |   |
| 146               | 5-Tricosylresorcinol            | C29H52O2  | 431.3867  | 3.26 | 36.90 | 8.46 | 109.0272 (64.72%); 119.0487 (100%)                                                                                        | -6.33  | 83.42 |   |   |   |   |   |   |   | X | X |   |   | X |   |   |   |
| 147               | Oleoside dimethylester          | C18H26O11 | 417.1398  | 3.32 | 38.4  | 0.0  | 0                                                                                                                         | -0.93  | 93.26 |   |   |   |   |   |   |   |   | X |   |   |   |   |   |   |
| 148               | [6]-Gingerol                    | C17H32O4  | 299.2204  | 3.36 | 34.7  | 0.0  | 0                                                                                                                         | -7.97  | 82.19 |   |   |   |   |   |   |   |   |   | X |   |   |   |   | X |
| 149               | Esculetin                       | C9H6O4    | 177.01857 | 3.54 | 38.1  | 0    | 0                                                                                                                         | -4.26  | 95.69 | X | X | X | X | X |   |   |   |   |   |   |   |   |   |   |
| 150               | 6,7-Furanocoumarin              | C11H6O3   | 185.0259  | 3.54 | 37.6  | 8.7  | 145.0278 (10.48%)                                                                                                         | 7.74   | 88.21 |   |   |   |   |   |   |   |   |   | X |   |   |   |   |   |
| 151               | Coumarin                        | C9H6O2    | 145.0306  | 3.60 | 40.0  | 16.3 | 117.0332 (57.38%)                                                                                                         | 7.33   | 92.09 | X | X |   |   | X | X |   |   |   |   |   |   |   |   | X |
| 152               | Scopoletin                      | C10H8O4   | 191.0332  | 3.60 | 40.7  | 14.3 | 97.0276 (15.77%); 99.0432 (33.71%)                                                                                        | -9.36  | 99.45 |   |   | X |   |   |   |   | X |   | X | X |   |   |   | X |
| 153               | Arbutin                         | C12H16O7  | 271.0812  | 3.91 | 39.8  | 6.0  | 141.0170 (0.74%)                                                                                                          | -4.10  | 97.71 |   | X |   |   |   |   |   | X |   |   |   | X |   | X |   |

|           |                                 |          |           |       |      |      |                                    |       |       |   |   |   |   |   |   |   |   |   |   |   |   |
|-----------|---------------------------------|----------|-----------|-------|------|------|------------------------------------|-------|-------|---|---|---|---|---|---|---|---|---|---|---|---|
| 154       | Phenol                          | C6H6O    | 93.035067 | 3.94  | 38.5 | 0    | 0                                  | 5.09  | 98.56 |   | X | X |   | X |   |   |   |   |   |   |   |
| 155       | Umbelliferone                   | C9H6O3   | 161.02442 | 3.96  | 39.3 | 0    | 0                                  | 0.01  | 96.61 | X | X |   | X |   |   |   |   |   |   |   |   |
| 156       | Vanillin                        | C8H8O3   | 151.03954 | 4.46  | 38   | 0    | 0                                  | -3.47 | 93.86 | X | X | X |   |   |   |   |   |   |   |   |   |
| 157       | Ferulaldehyde/Mellein           | C10H10O3 | 177.0564  | 4.49  | 37.7 | 0    | 0                                  | 3.83  | 93.22 |   | X |   |   |   |   |   |   |   |   |   |   |
| 158       | Esculin                         | C15H16O9 | 339.07091 | 5.28  | 48.3 | 50.8 | 121.0289 (100%); 149.0237 (84.01%) | -3.67 | 95.21 |   | X |   |   |   |   |   |   |   |   |   |   |
| 159       | Sinapaldehyde                   | C11H12O4 | 207.06658 | 5.90  | 38.3 | 0    | 0                                  | 1.44  | 93.11 | X |   |   |   |   |   |   |   |   |   |   |   |
| 160       | Coumestrol                      | C15H8O5  | 267.0319  | 6.45  | 35.1 | 0.0  | 0                                  | 7.64  | 84.01 |   |   |   |   |   |   |   | X |   |   |   | X |
| 161       | 4-Hydroxybenzaldehyde           | C7H6O2   | 121.0290  | 7.55  | 57.8 | 94.9 | 92.0263 (100%)                     | -3.91 | 98.89 | X | X | X | X | X |   |   |   |   |   |   | X |
| 162       | Demethoxycurcumin               | C20H18O5 | 337.10822 | 11.12 | 38   | 0    | 0                                  | 0.21  | 90.31 | X |   |   |   |   |   |   |   |   |   |   | X |
| 163       | Carnosol                        | C20H26O4 | 329.1745  | 12.23 | 37.9 | 0.0  | 0                                  | -4.12 | 94.29 |   |   |   |   |   |   | X |   |   |   | X |   |
| LIGNANS   |                                 |          |           |       |      |      |                                    |       |       |   |   |   |   |   |   |   |   |   |   |   |   |
| 164       | Sesaminol/Episesaminol I        | C20H18O7 | 369.0979  | 1.71  | 38.7 | 0.0  | 0                                  | -0.31 | 93.76 |   |   |   |   |   | X | X |   | X |   | X | X |
| 165       | Enterolactone                   | C18H18O4 | 297.1158  | 11.37 | 34.4 | 0.0  | 0                                  | 8.50  | 81.44 |   |   |   |   |   |   | X |   |   |   |   |   |
| 166       | 1-Acetoxypinoresinol            | C22H24O8 | 415.1365  | 3.57  | 35.6 | 5.3  | 135.0430 (100%)                    | -8.05 | 81.86 |   |   |   |   |   |   | X |   |   | X |   |   |
| 167       | Schisantherin A                 | C30H32O9 | 535.2024  | 4.06  | 35.9 | 0.0  | 0                                  | 9.34  | 89.60 |   |   |   |   |   |   |   | X |   |   |   |   |
| 168       | Sesaminol/Episesaminol II       | C20H18O7 | 369.0945  | 4.40  | 34.5 | 0.0  | 0                                  | -9.29 | 82.79 |   |   |   |   | X |   |   |   | X |   | X |   |
| 169       | Dimethylmatairesinol/Gomisin M2 | C22H26O6 | 385.1621  | 5.29  | 35.7 | 0.0  | 0                                  | -9.24 | 88.57 |   |   |   |   |   |   |   | X |   |   |   |   |
| STILBENES |                                 |          |           |       |      |      |                                    |       |       |   |   |   |   |   |   |   |   |   |   |   |   |
| 170       | Viniferin/Pallidol              | C28H22O6 | 453.1352  | 4.64  | 36.1 | 0.0  | 0                                  | 1.84  | 82.55 |   |   |   |   |   |   |   | X |   |   |   |   |
| 171       | Resveratrol 3-O-glucoside       | C20H22O8 | 389.1230  | 5.40  | 39.7 | 10.9 | 265.0731 (5.83%)                   | -2.99 | 91.02 |   |   |   |   |   | X | X | X |   | X | X | X |
| 172       | Piccatannol                     | C14H12O4 | 243.0648  | 6.08  | 37.9 | 0.0  | 0                                  | -5.91 | 96.22 |   | X |   |   | X |   |   |   |   |   |   | X |

m/z = mass/charge. Bold represent reference standards.
